# Supplementary material for: The prevalence of Fabry disease in a statewide chronic kidney disease cohort – Outcomes of the aCQuiRE (Ckd.Qld fabRy Epidemiology) study
Source: PubMed Central journal article supplement (PMC9066726; doi:10.1186/s12882-022-02805-8), 2022-05-04

## Supplementary Figure 2. Proportions of CKD patients by stages

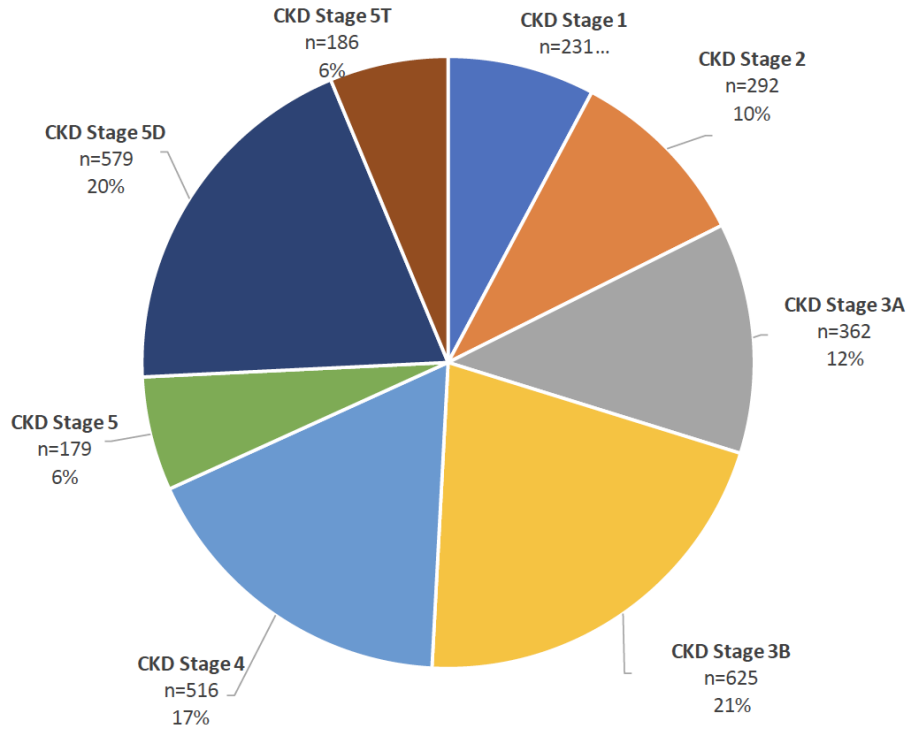

CKD=Chronic Kidney Disease  
 RBWH=Royal Brisbane and Women's Hospital  
 Twba=Toowoomba  
 G.Coast=Gold Coast  
 H.Bay=Harvey Bay

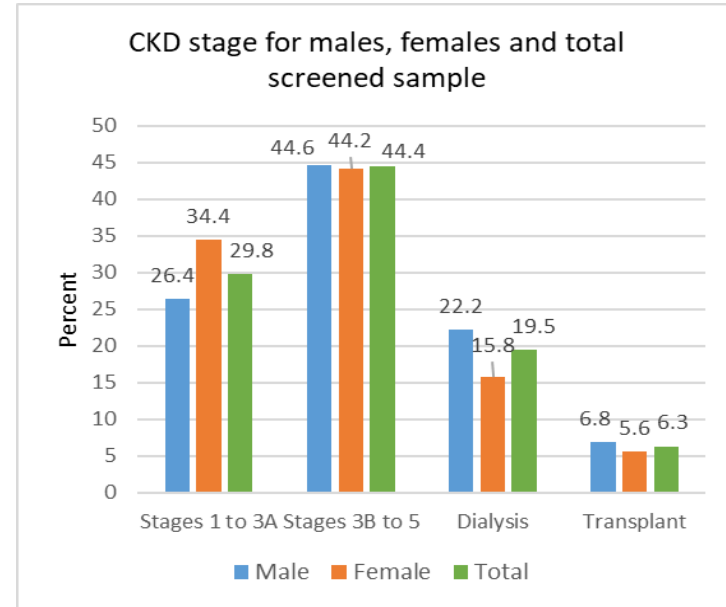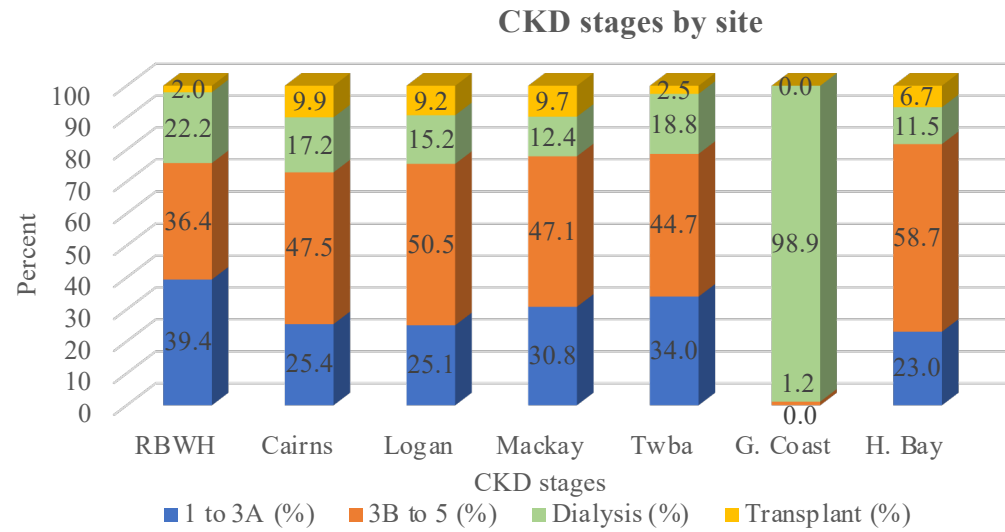

Supplement: 12882_2022_2805_MOESM3_ESM.pdf [file 12882_2022_2805_MOESM3_ESM.pdf]
