# Supplementary material for: The prevalence of Fabry disease in a statewide chronic kidney disease cohort – Outcomes of the aCQuiRE (Ckd.Qld fabRy Epidemiology) study
Source: Springer Nature journal article supplement (doi:10.1186/s12882-022-02805-8), 2022-05-04
Supplement: MOESM2 [file 20371248]

**Supplementary Figure 1. Age at consent of patients for Fabry (1) and Not Fabry (2) groups**

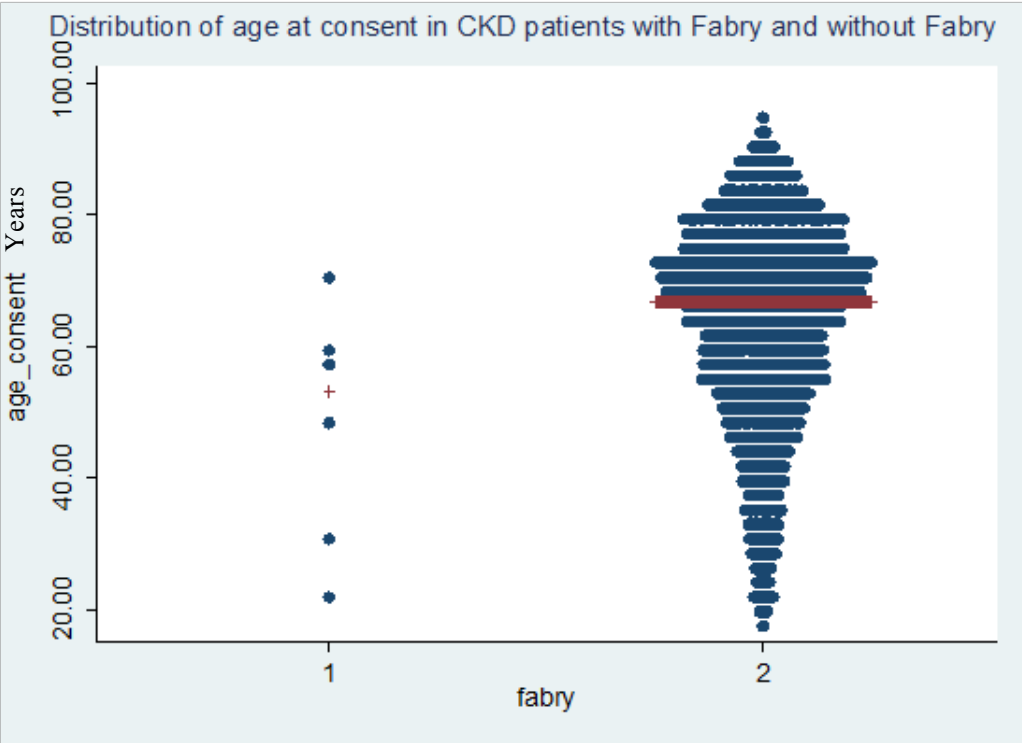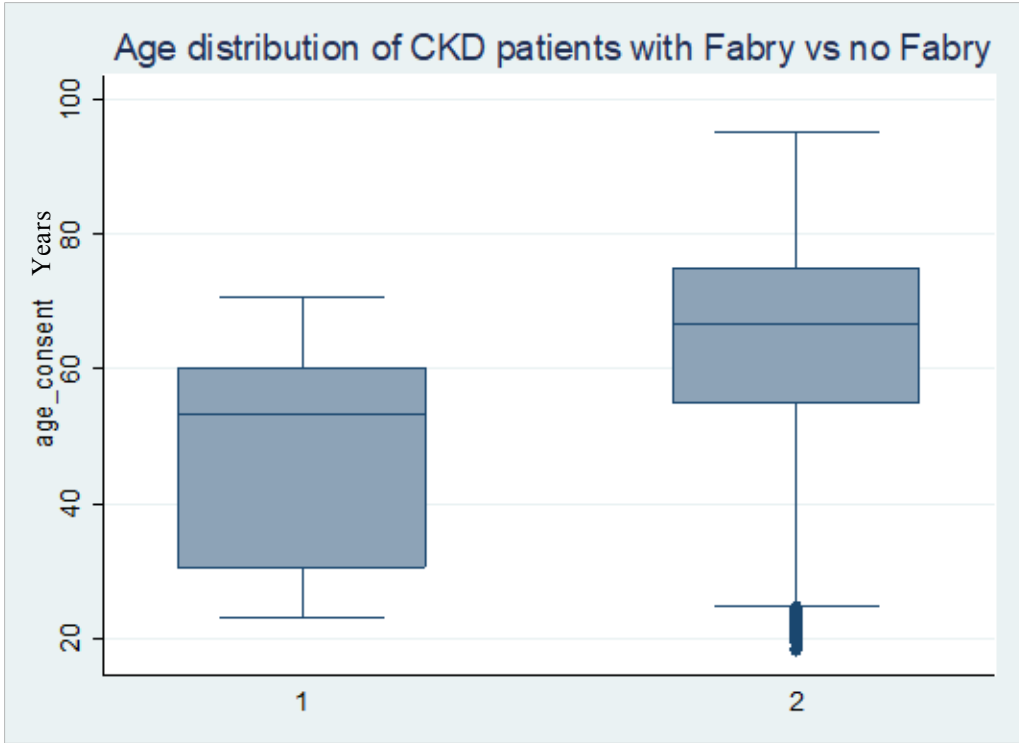

CKD = Chronic Kidney Disease
